# 1 **Partial correlation analysis of transcriptomes helps detangle the** 2 **growth and defense network in spruce**

3 Ilga Porth<sup>1,2</sup>, Richard White<sup>3†</sup>, Barry Jaquish<sup>4</sup>, Kermit Ritland<sup>2</sup>

4 <sup>1</sup>Département des sciences du bois et de la forêt, Institut de biologie intégrative et des  
5 systèmes, Université Laval, Québec, QC, Canada;<sup>2</sup>Department of Forest and Conservation  
6 Sciences, University of British Columbia, Vancouver, BC, Canada;<sup>3</sup>Department of Statistics,  
7 University of British Columbia, Vancouver, BC, Canada;<sup>4</sup>Kalamalka Forestry Centre, British  
8 Columbia Ministry of Forests, Lands and Natural Resource Operations, Vernon, BC, Canada

9  
10 Author for correspondence:

11 *Ilga Porth*

12 *Tel.: +1 (418) 656-2131*

13 *Email: [ilga.porth@sbf.ulaval.ca](mailto:ilga.porth@sbf.ulaval.ca)*

14

15 <sup>†</sup> In memory of Rick White (1964-2016)

16

|                                                               |       |                                      |                                                      |
|---------------------------------------------------------------|-------|--------------------------------------|------------------------------------------------------|
| Total word count (excluding summary, references and legends): | 5,338 | No. of Figures:                      | 3 (Figure 2A and B in colour)                        |
| Summary                                                       | 200   | No. of Tables:                       | 3                                                    |
| Introduction                                                  | 752   | No. of Supporting Information files: | 11 (Figs.S1-S2 in colour; Tables S1-S6; Notes S1-S3) |
| Materials and Methods:                                        | 1,437 |                                      |                                                      |
| Results:                                                      | 952   |                                      |                                                      |
| Discussion:                                                   | 2,146 |                                      |                                                      |
| Acknowledgements:                                             | 51    |                                      |                                                      |

17

18 SUMMARY

19

- 20 • In plants, there can be a trade-off between resource allocations to growth versus  
21 defense. Here, we use partial correlation analysis of gene expression to make  
22 inferences about the nature of this interaction.
- 23 • We studied segregating progenies of Interior spruce subject to weevil attack. In a  
24 controlled experiment, we measured pre-attack plant growth and post-attack damage  
25 with several morphological measures, and profiled transcriptomes of 188 progeny.
- 26 • We used partial correlations of individual transcripts (ESTs) with pairs of  
27 growth/defense traits to identify important nodes and edges in the inferred underlying  
28 gene network, e.g., those pairs of growth/defense traits with high mutual correlation  
29 with a single EST transcript. We give a method to identify such ESTs.
- 30 • A terpenoid ABC transporter gene showed strongest correlations ( $P=0.019$ ); its  
31 transcript represented a hub within the compact 166-member gene-gene interaction  
32 network ( $P=0.004$ ) of the *negative* genetic correlations between growth and  
33 subsequent pest attack. A small 21-member interaction network ( $P=0.004$ )  
34 represented the uncovered *positive* correlations.
- 35 • Our study demonstrates partial correlation analysis identifies important gene networks  
36 underlying growth and susceptibility to the weevil in spruce. In particular, we found  
37 transcripts that strongly modify the trade-off between growth and defense, and allow  
38 identification of networks more central to the trade-off.

39 **Key words:** gene networks, genetic correlations, growth, herbivory, perennials, *Picea*

40

41 INTRODUCTION

42

43 Coevolved host defenses and herbivores have a long-term evolutionary history (Futuyma &  
44 Agrawal, 2009). The resource allocation towards growth on one side, and towards defense  
45 and/or reproduction on the other side, is governed by suites of genes and their metabolic  
46 pathways. Trade-offs between life-history traits involve the hierarchical allocation of  
47 resources to biochemical pathways (Worley *et al.*, 2003). Thus, major plant defense theories  
48 surrounding a trade-off between growth and defense mainly center on carbon/nutrient balance  
49 and growth differentiation balance and the associated allocation costs for defense at the  
50 expense of growth and reproduction (Bryant *et al.*, 1983; Herms & Mattson, 1992). It is well  
51 known that certain signaling pathways usually required for developmental processes  
52 (reproductive development, *e.g.*, Howe & Jander, 2008; Steppuhn & Baldwin, 2008) can be  
53 co-opted for biotic stress responses that directly influence the performance of the pest or  
54 contribute indirect defense responses to attract predators or herbivore parasitoids (Thaler *et*  
55 *al.*, 2002). This provides the plant with inducible defenses against herbivores or pathogens  
56 that are evolutionary advantageous (Steppuhn & Baldwin, 2008). Moreover, when plant  
57 growth is decreased by drought for example, then, more carbon becomes available for the  
58 production of secondary compounds. Thus, drought stress was shown to increase oleoresin  
59 concentration in conifers' woody tissue with the consequence of higher resistance against  
60 herbivory (Turtola *et al.*, 2003). Regarding the genetic underpinnings of a growth/defense  
61 trade-off, genomic investigations can disentangle this myriad of interactions and demonstrate  
62 evolutionary trade-offs between growth and defense. In this paper, we adopt partial  
63 correlation analysis to help disentangle such trade-off interactions between growth and  
64 defense in trees.

65         White spruce (*Picea glauca*) and Interior spruce (*P. glauca x engelmannii*) are the  
66 economically most important forest tree species in British Columbia. However, both species  
67 suffer from infestations by the spruce shoot weevil (*Pissodes strobi*), which consumes the  
68 phloem of the apical leader and deforms the main stem (Alfaro *et al.*, 2004; vanAkker *et al.*,  
69 2004; King *et al.*, 1997; He & Alfaro, 2000; Kiss & Yanchuk, 1991; Tomlin *et al.*, 1998).  
70 Under the pressing need to understand the genetic control of resistance, studies with *Picea*  
71 have illustrated host defenses to phloem feeding insects (Ralph *et al.*, 2006; Lippert *et al.*,  
72 2007; Miller *et al.*, 2005; Byun-McKay *et al.*, 2006; McKay *et al.*, 2003). Ralph *et al.*  
73 (2006) originally documented herbivore-induced transcriptome variation, reflecting either

74 reallocation of resources from primary processes to active defense, or the mobilization of the  
75 resources for host tolerance (Howe & Schaller, 2008). Anatomical and the associated  
76 chemical defenses in *Picea* bark have also been described (Franceschi *et al.*, 2005). The  
77 physical structures studied in most detail are the parenchyma cells, and the resin ducts that  
78 are all located in the secondary phloem and cambium; the traumatic resin canals are formed  
79 in the secondary xylem (Franceschi *et al.*, 2005).

80 In *Picea*, the genetic relationship of insect resistance with height growth is ambiguous  
81 (Kiss & Yanchuk, 1991; King *et al.*, 1997; Alfaro *et al.*, 1997; He & Alfaro, 2000; Lieutier *et*  
82 *al.*, 2003). In Sitka spruce, interestingly, genetic resistance was highest in families with only  
83 average growth rate (Alfaro *et al.*, 2008). Also, constitutive and induced defenses do not  
84 always follow sequentially: some resistant trees do not produce/rely on traumatic resinosis (a  
85 direct measure for resistance); however, some trees from susceptible families do defend with  
86 intensified resin flow to wounding (Alfaro, 1995).

87 Therefore, in the present study, our specific objective was to identify genes  
88 underlying the trade-off between growth rate and weevil resistance. In an experiment initiated  
89 by René Alfaro (Alfaro *et al.*, 2004), *Picea glauca x engelmannii* progenies were measured  
90 for pre-attack plant growth and post-attack damage with several morphological measures,  
91 which formed the basis of our hypotheses about correlations. We then estimated gene  
92 expression in bark tissue from terminal leaders using microarrays spotted with 13,980 ESTs  
93 and their annotated respective transcripts. For network inference, we used a new approach  
94 where, with respect to joint values of growth and weevil susceptibility (host defense) traits,  
95 we identified a subset of transcripts that exhibited either strong excessive (1) positive partial  
96 phenotypic correlations or (2) negative partial phenotypic correlations. That is to say, we  
97 chose ESTs that had strong indirect effects on both growth and susceptibility to the weevil, as  
98 either jointly positive or jointly negative. These subsets of transcripts were then subject to  
99 network analysis, but using entire correlations as the measure of similarity. Our results  
100 illustrate how partial correlation analysis of transcript levels can help reveal genes involved  
101 in the trade-off between growth and resistance.

102

103 MATERIALS AND METHODS

104

105 Interior spruce pedigree

106 The experimental population of Interior spruce (*Picea glauca* (Moench) Voss x *P.*  
107 *engelmannii* Parry ex Engelm.) at the Kalamalka Research Station in Vernon, British  
108 Columbia (BC), Canada, established in 1995, comprises of 42 full-sib families, each of size  
109 75, from parents selected throughout the Prince George Seed Planning Zone in Northern BC  
110 (Alfaro *et al.*, 2004). On the basis of previous weevil attack, parents were classified as  
111 resistant (R) or susceptible (S), so that families could be grouped as deriving from two  
112 resistant parents (R\*R: 16 families), one resistant and one susceptible parent (R\*S: 20  
113 families), or both susceptible parents (S\*S: 6 families). These 42 families were scored for  
114 growth and resistance traits. The experimental setup and sampling details are as described in  
115 Porth *et al.* (2011).

116

117 Phenotypic assessments

118 Initial (early spring) height was recorded in years 1995-1999, terminal leader length  
119 was measured in 1999, and weevils were artificially applied in October 1999. After Alfaro *et*  
120 *al.*, (2004), attack rates in 2000 and 2001 were classified as (1) successful top kills, (2) attack  
121 but no death of leader, and (3) 'no attack'. The number of eggs laid (oviposition) was also  
122 visually recorded as five discrete classes of egg punctures: (1–25), (26–50), (51–75), (76–  
123 100), (101+); these were easily distinguished from feeding punctures (R. Alfaro, pers.  
124 comm.). The sums of weevil attacks and oviposition for 2000 and 2001 were also used as  
125 resistance traits. For the 1999 growing season, bark histology measures were taken for 10  
126 trees per cross, with resin duct measurements taken on upper laterals closest to the leader  
127 (Alfaro *et al.*, 2004). In the present study we retained only such resin canal characteristics  
128 where a positive linear relationship between the leader and the laterals from the same whorl  
129 had been shown (Alfaro *et al.*, 2004). The following abbreviations for labels and formulas  
130 related to bark histology measures were used that followed those provided in Alfaro *et al.*,  
131 (2004): AREALRC [area of large resin canals (microns squared)], AREASRC [area of small  
132 resin canals (microns squared)], TAREARC [total area of resin canals, large plus small  
133 (microns squared)], LRC\_BA [AREALRC/BARKAREA], SRC\_BA  
134 [AREASRC/BARKAREA], TRC\_BA [TAREARC/BARKAREA], NOLRC [number of large  
135 resin canals], NOSRC [number of small resin canals], TOTNORC [total number of resin

136 canals (large plus small)], SZ\_IN [AREALRC/NOLRC], NMMS\_IN [NOLRC/BAMM],  
137 NMMS\_OUT [NOSRC/BAMM], NMMS\_TOT [TOTNORC/BAMM], BTHK [bark  
138 thickness in mm], BARKAREA [total quadrant bark area (square microns)], and BAMM  
139 [bark area in mm squared].

#### 140 Tissue collection, RNA preparation, microarray, and gene expression profiling

141 Weevil activity was also observed when we sampled in spring of 2006, and precise records of  
142 attacks on-site due to an elevated weevil population were available from 2000-2003.  
143 However, for this particular experiment, newly attacked shoots/tree leaders were intentionally  
144 excluded from sampling in order to be able to perform an experiment on constitutive levels of  
145 defense traits. Thus, we sampled at the right time point, when natural weevil activity occurred  
146 in the field. Bark and phloem tissue were collected in the mornings of May 16-18, 2006 and  
147 frozen in liquid nitrogen. As we were measuring gene expression, every effort was made to  
148 randomize and standardize the collections of tissue. Total RNA was isolated following  
149 (Kolossova *et al.*, 2004) and quantified via NanoDrop® ND-1000 spectrophotometer; RNA  
150 integrity was evaluated using Agilent 2100 Bioanalyzer. The 21,840 spruce ESTs microarray  
151 we used for gene expression profiling in this study and the microarray's quality control are  
152 described elsewhere (S. Ralph and co-workers, Gene Expression Omnibus database GEO:  
153 GPL5423). A total of 13,980 annotated spruce EST elements were retained for this study.  
154 Hybridizations and image acquisition were carried out as described in Ralph *et al.* (2006) and  
155 Porth *et al.*, (2011).

156

#### 157 Microarray experimental design and processing of data

158 A subset of four R\*S families, with wide segregation for weevil resistance, were chosen for  
159 the gene expression assay. The hybridizations profiled 188 individuals: 48, 36, 50, and 54 in  
160 crosses #26, #27, #29, and #32, respectively. After quantitation of the signal intensities in  
161 each array, the local background was subtracted for each sub-grid. Data were further  
162 normalized using the variance stabilizing normalization method implemented in R package  
163 'vsn' (Huber *et al.*, 2002). All slides underwent simultaneous normalization to yield a similar  
164 overall expression level and variance for each channel independent of the array. A linear  
165 model that incorporated dye and block effects in a two-colour microarray design was used  
166 (Porth *et al.*, 2011). Signal intensities for the original and the normalized measurements were  
167 deposited in GEO under GSE22116.

168

169 Partial correlation analyses

170 Using family means, we estimated genetic correlations in the 42 *P. glauca x engelmannii*  
171 crosses. We found: 1) genetic correlations between growth and susceptibility were negative  
172 but not strong ( $r \sim -0.2$ ,  $P < 0.05$ ), 2) genetic correlations between bark histology measures and  
173 attack severity were negative and stronger ( $r \sim -0.5$ ,  $P < 0.05$ ), and 3) genetic correlations  
174 between histology and growth were all positive (Fig. S1). These are in accord with previous  
175 studies (Kiss & Yeh 1987; Kiss & Yanchuk 1991; King *et al.*, 1997) and serve to frame our  
176 hypothesis that growth and attack have a negative genetic correlation, but show an overall  
177 positive phenotypic correlation ( $r = 0.85$ ,  $P < 0.05$ ).

178 To explore the gene networks underlying relations between growth and attack, we  
179 used partial correlation analysis to examine how the correlation between two variables  
180 (growth and attack) is influenced by a third variable, a gene expression locus ( $E$ ). As we  
181 assayed 13,980 ESTs, we sought to identify ESTs of major effect, and to identify these, most  
182 obviously we can inspect bivariate relationships. Fig. 1 plots the observed amounts of growth  
183 and attack across 1255 ESTs that had a significant association ( $P < 0.01$ ) of expression with  
184 the two traits (growth was measured by leader length in yr 1999, and attacks were summed  
185 over yrs 2000 and 2001; correlations were recomputed in 1,000 randomized datasets). The  
186 phenotypic strength of association almost exactly matches the observed phenotype correlation  
187 of 0.85 between growth and attack, but this by itself does not provide any further inferences,  
188 especially about networks.

189 To this end, we employ the logic of partial correlation to find nodes that are more  
190 central to the gene network underlying growth and defense. Let  $E$  be an expressed gene,  $X$  be  
191 one trait (growth or susceptibility) and  $Y$  be a second trait (growth or susceptibility). The  
192 following are the observed phenotypic correlations:  $r_{XY}$  between  $X$  and  $Y$ ,  $r_{XE}$  between  $X$  and  
193  $E$ , and  $r_{YE}$  between  $Y$  and  $E$ . The partial correlation between  $X$  and  $Y$ , that is the correlation  
194 after the confounding effect of  $E$  is removed, is

195 
$$r_{XY.E} = \frac{r_{XY} - r_{XE}r_{YE}}{\sqrt{1 - r_{XE}^2} \sqrt{1 - r_{YE}^2}} \quad (1)$$

196 A significant partial correlation can be caused by a mutual effect of  $E$  on both  $X$  and  $Y$ ; this  
197 can occur when  $E$  is at the more central node to  $X$  and  $Y$ , relative to other possible nodes. If  
198  $r_{XE}$  and  $r_{YE}$  are either both positive or negative, the partial correlation will be reduced,  
199 otherwise the partial correlation will be increased. Regardless of the direction of change, the

200 amount of change is proportional to the relative importance of  $E$  in the network of  $X$  and  $Y$ .

201 A measure of the relative change due to the introduction of  $E$  is

$$202 \quad d_{XY,E} \equiv (r_{XY} - r_{XY,E})/r_{XY} \quad (2)$$

203 Greater values of  $d_{XY,E}$  occur when  $E$  explains a greater fraction of the correlation between  $X$

204 and  $Y$ , or generally when  $E$  is in a tighter network with  $X$  and  $Y$ .

205 We found the more direct connections within a network by systematically evaluating

206 Equation (2) for all pairs of quantitative traits  $X$  and  $Y$ , for each EST  $E$ . Values of  $d_{XY,E}$

207 greater than a significance threshold are retained in the network; executing this over all

208 possible edges results in a network of putative direct interactions. In constructing the final

209 network, we used total correlations as opposed to the partial correlation quantities in Eq. 2,

210 which only serve to identify ESTs to retain in the network.

211 A partial correlation threshold network (PCTN) can also be established with rigorous

212 application of a threshold (Kenett *et al.*, 2010), but we simply identified two groups. One

213 group of 21 had all positive  $d_{XY,E}$  values and the second group of 166 had all negative  $d_{XY,E}$

214 values; these groups are described in Notes S1. Significance was again determined by

215 randomization and ESTs of extremely high probability were retained (see Notes S1). One can

216 imagine each group is the average of several tips in Fig. 1 (there are  $n(n-1)/2$  tips for  $n$  traits).

217 We note that, in principle, groups of ESTs with all ++ or --  $X$  vs  $Y$  effects, and with all +- and

218 +-  $X$  vs  $Y$  effects, could be grouped as co-variates in a multivariate partial correlation

219 analysis.



220 RESULTS

221

222 *The genetic basis of susceptibility to weevil attack/growth trait correlations (genetic*  
223 *pleiotropy) in P. glauca x engelmannii*

224 Total correlations in the two-by-two factorial R\*S spruce progeny are given in Table 1. We  
225 identified numerous significant positive and negative correlations between gene expression  
226 levels for individual ESTs and the phenotypic traits (Table S1). In addition, *p*-values were  
227 computed for each gene-by-growth effect, and then *q*-values were calculated to adjust for  
228 false discovery rate (Storey & Tibshirani, 2003). The effect estimate for each gene was also  
229 obtained representing the change in its expression per unit change in growth rate. This  
230 identified 867 genes at  $q < 0.1$ , Table S2.

231 We also determined the partial correlations by using the ESTs as independent  
232 variables and estimated the relative differences between the total and the partial correlations  
233 (Table 2). These pairwise comparisons (*i.e.* the pairwise growth-resistance trait comparisons  
234 representing the partial correlation in either direction between growth and susceptibility to  
235 weevil attacks) showed large transcriptome responses in terms of the partial correlations  
236 representative of the pairwise comparisons between traits (Fig. S2) along with the different  
237 effects (*i.e.* the negative and the positive directions, respectively) of the components of these  
238 correlations between susceptibility to weevil attacks and growth (Notes S1 for details). Thus,  
239 we could uncover all possible combinations related to our initial hypothesis testing regarding  
240 the directionality of the genetic correlations to be tested with individual traits (Fig. 1).

241 We estimated the correlations' upward bounds involving the top 100 genes in the  
242 positive and the negative correlations between the susceptibility to weevil attacks and growth,  
243 respectively (Table 2). This provided a clear picture regarding a significant increase (top 100-  
244 ) of the partial correlations coefficient compared to the phenotypic (total) correlations which  
245 had shown a positive trend for growth and weevil attack (Table 2). Therefore, the results  
246 relating to the partial correlations also indicated that we could uncover the genetic effect of  
247 the transcriptome attributed to the negative genetic correlations between weevil attack and  
248 height growth in spruce (see above). Still, we found transcripts that could enhance growth but  
249 could also have a negative impact on resistance or vice versa (positive correlations), Table 2.

250

251 *Identification of candidate networks using partial correlations*

252 The Supplement material (Notes S1) gives the relative partial correlations (Eq. 2) for  
253 individual ESTs and each of the six pairwise combinations of the four traits. These four traits  
254 were ldr\_99 (leader length in 1999), Ht\_5yrs (height at age 5) and atktot (attack damage,  
255 total), egtot (egg number, total). There were many significant positive and negative partial  
256 correlations between gene expression levels for individual ESTs and the phenotypic traits.  
257 Hence, there was sufficient power to use partial correlation analysis to detect networks of  
258 interest. Thus, most importantly, on the basis of the partial correlation analysis and Eq. 2, we  
259 identified two distinct compact networks ( $P=0.004$  for all pairwise comparisons) for the  
260 positive correlations (++ or -- effects) involving 21 transcripts (represented by Fig. 2A) and  
261 for the negative correlations involving 166 transcripts (corresponding to +- or -+ effects),  
262 respectively (represented by Fig. 2B), and in Fig. 1, respectively. The details of the genes'  
263 identities for these two networks are provided in Table S3 (corresponding to the network  
264 presented in Fig. 2A) and in Table S4 (Fig. 2B). The complete lists of genes used in four  
265 transcript files (of sizes 100, 166 and 21, respectively) are given in Notes S1 as well as in  
266 Tables S3-S6.

267

268 *The genes at the centre of pleiotropy between tree growth and pest resistance in *P. glauca* x*  
269 *engelmannii*

270 A putative PDR type ABC transporter *ATPDR12/PDR12* (*PLEIOTROPIC DRUG*  
271 *RESISTANCE 12*), represented as element WS0269\_K02 on the 21.8k spruce EST array,  
272 showed the strongest significance among all 13,980 tested transcripts in the correlations  
273 between gene expression, tree height and weevil attack phenotypes ( $P= 0.019$ ), Table 3.  
274 Variation in *PDR12* steady-state gene expression at the population level represents an  
275 example of transcripts that were positively correlated with height but negatively correlated  
276 with weevil susceptibility traits (+- effects) in the two-by-two factorial crosses progeny  
277 widely segregating for resistance. A set of additional genes showed the same directionality in  
278 gene expression with growth and resistance variation for this large progeny of 188  
279 individuals originating from 4 different crosses (Table S1).

280 However, among transcripts that correlated negatively (-- effects) with both growth  
281 and attack/oviposition (again tested by 1,000 permutations), there were spruce genes with the  
282 following functions: (a) dirigent proteins related to constitutive defenses (array elements  
283 WS0086\_I04 and WS0104\_A04 annotated as *PicsiDIR29* and *PicsiDIR35*, respectively  
284 (Ralph *et al.*, 2007; Porth *et al.*, 2011)), (b) peroxidases important in the reinforcement of

285 anatomical structures through lignification (WS01029\_G23, WS01033\_K22, and  
286 WS01017\_F04 (Porth *et al.*, 2011)), (c) other cell wall modifying proteins such as  
287 xyloglucantransglycosylases (WS0264\_P12, WS0041\_D16), xyloglycosyltransferases  
288 (WS0072\_C14, WS00918\_N14), pectinesterase (WS0039\_I15), (d) stress inducible  
289 peroxidase *PicabPIPRX* (WS01029\_D16 (Porth *et al.*, 2011)), stress signaling pathway  
290 related AP2 domain transcription factor *TINY* (WS0102\_C24) (Sun *et al.*, 2008), (e)  
291 flavonoid-based defense related *F3'H* (WS00931\_D17 (Porth *et al.*, 2011)), and finally (f)  
292 the weevil-inducible terpene synthase (WS0078\_K20 (Kolosova, 2010)). Three candidates  
293 that showed the negative correlation with growth, the chaperonin heat shock protein 60  
294 WS00920\_E06, the ethylene inducible universal stress protein family protein WS01027\_A08,  
295 as well as the terpene synthase WS00929\_B22 were found to be significantly downregulated  
296 in weevil-resistant spruce trees (Verne *et al.*, 2011).

297         Our results indicated that expression of these three genes negatively correlated with  
298 attack rates, and their expression was also negatively correlated with growth; therefore we  
299 assume a potential trade-off. Among all these genes mentioned above, only three were  
300 represented in the 21-member gene-gene interaction network (the two spruce peroxidases  
301 potentially implicated in lignification, WS01033\_K22, and WS01017\_F04, as well as the  
302 spruce AP2 domain transcription factor *TINY* WS0102\_C24), Fig. 2A and Table S3.  
303

304 DISCUSSION

305

306 Our work investigated the co-evolution of height growth vigour and pest resistance in spruce  
307 and employed transcriptomics data to obtain insights into this relationship. We assayed for  
308 gene expression levels in a sample of four families (188 individuals in total) segregating for  
309 weevil resistance. Gene expression levels were interrogated for 13,980 annotated ESTs  
310 spotted on a 21.8k member microarray. We then estimated the partial correlations of pairs of  
311 growth/attack traits with gene expression levels, and identified ESTs of high correlation  
312 likely at the centre of such phenotypic trait correlations among growth and attack traits.

313 In conifers, the generalized strategy for protection against bark boring pests are the  
314 constitutive defenses that are localized within the periderm, the cortex, the secondary phloem  
315 and xylem and are arranged in concentric, multiple layers (Franceschi *et al.*, 2005). Toxins,  
316 antifeedants, defensive proteins and enzymes, and reservoirs of chemicals such as resins are  
317 released from the bark upon attack. The spruce shoot weevil attacks the host tree at the shoot  
318 apical leader of previous year's growth (Kiss & Yanchuk, 1991). The apical leader unites the  
319 high fitness value for the tree's competitiveness with high probability for weevil attack;  
320 consequently, this part of the tree receives priority in the allocation of defense metabolites.  
321 The attractiveness of the prospective host to the herbivore is highly related to the host's  
322 nutritional adequacy (*e.g.* content of sterols, lipids, fatty acids, amino acids, carbohydrates).  
323 Since preformed defenses are established coordinately during the development of secondary  
324 xylem in the apical shoot (Friedmann *et al.*, 2007), the tree's innate metabolism related to  
325 growth and normal development very likely influences the establishment of these defenses  
326 directly, thus forming the foundation for genetic pleiotropy. In the present study, we further  
327 explored the evidence of pleiotropy between growth and constitutive resistance against the  
328 herbivore in the host (Porth *et al.*, 2012) including a potential trade-offs.

329 We investigated the correlations between growth and resistance traits involving  
330 transcript expression to identify genes that might be at the centre of potential trade-offs  
331 between inherent growth rate and constitutive defenses. Transcriptomics can uncover  
332 causality in true interactions between genes, if in the analysis of pairwise gene interactions all  
333 other transcripts are also considered (partial correlation analysis, *c.f.* Johansson *et al.*, 2011).  
334 Consequently, our correlation networks based on such analysis highlighted the more direct  
335 associations among the myriad of all possible associations.

336

337 JA biosynthesis genes

338 Hormonal crosstalk is indispensable for regulating the growth-defense trade-offs and  
339 jasmonate (JA) signaling lies at the centre of networks that define defense strategies against  
340 herbivory (Huot *et al.*, 2014). The differential regulation of certain components/steps in the  
341 JA pathway generates distinct responses to different stimuli (reproductive development,  
342 growth or types of defenses that can be active defenses (Kazan & Manners, 2008)).  
343 Following the apparency theory, fast growing individuals are thought to be biased towards  
344 induced defenses (Steppuhn & Baldwin, 2008). The chemical compounds providing active  
345 (induced) protective defenses against herbivory are the terpenoids and some phenolic  
346 derivatives (such as tannins (Bauce *et al.*, 2006)). In general, the induced defenses rather  
347 acquire signaling systems from developmental programs; and such defenses are expressed  
348 only when required. Hence, such types of defenses primarily allow resource investment for  
349 the plant's competitiveness through increased growth (and reproduction). For example, one  
350 study failed to connect defensive tannin production with a growth trade-off (Haering *et al.*,  
351 2008), but see further below. In our study, the levels of JA defense signaling in fast growing  
352 (unattacked) progeny were lowered. Genes involved in the plastid located early JA  
353 biosynthetic steps (*LOXI*: WS01014\_A24; *AOS CYP74A*: WS01016\_F05 and *AOC2* genes:  
354 WS00820\_E17) all showed decreases in steady-state transcript abundance in fast growers  
355 (Table S2). We also retrieved these genes in the compact 166-member network involving the  
356 negative correlations between growth and attack (Fig. 2B). Also, the majority (c.70%) of the  
357 suite of the spruce genes involved in reproductive (male and female strobili) development,  
358 identified to be differentially expressed, exhibited increases in steady-state transcript  
359 abundance in fast growing (unattacked) progeny (Table S2).

360

361 Terpenoid-based defense

362 We identified two spruce genes with roles in terpenoid defense against herbivory in the  
363 compact 166-member network (Fig. 2B). First, we found *PDR12*, which is possibly involved  
364 both in constitutive as well as in induced defense. In *Arabidopsis*, *PDR12* shows a response  
365 to infection by necrotrophic fungal pathogens but its upregulated gene expression can also be  
366 artificially elicited by applications of methyljasmonate, salicylic acid and ethylene in growth  
367 media; its study revealed the first evidence of *active* transport of terpenoids in plant defenses  
368 (Campbell *et al.*, 2003; van den Brule & Smart, 2002). Second, we also identified a putative  
369 linalool oxygenase (*CYP76C1*) with a potential role in detoxification during plant-insect

370 interactions (Hofer *et al.*, 2014). Interestingly, expression levels of these two genes showed  
371 marked differences with growth rate, with *PDR12* increasing in steady-state transcript  
372 abundance in fast growers. Other spruce genes implicated in terpenoid metabolism including  
373 genes from the methylerythritol phosphate pathway, monoterpene (myrcene, pinene),  
374 sesquiterpene (farnesene), or tocopherol biosynthesis exclusively showed increases in steady-  
375 state transcript abundance in fast growers. Tocopherols promote stress tolerance by protecting  
376 against oxidative stress, while terpenoids have mostly active defensive functions.  
377 Interestingly, these genes were not identified in previous weevil feeding experiments (where  
378 a very limited number of tested genotypes was included), thus they were also not functionally  
379 characterized previously (Ralph *et al.*, 2006; Keeling *et al.*, 2011). Possibly, the phenotypic  
380 expression of tolerance and well-established chemical defenses towards herbivory is mutually  
381 exclusive.

382

### 383 Flavonoid-based defense

384 Several flavonoid pathway-related genes were part of the 166-member network (Fig. 2B;  
385 Table S4). Functions were related to the biosynthesis of anthocyanins/tannins (protective  
386 function against herbivorous insect damage and/or associated fungi (Bauce *et al.*, 2006;  
387 Hammerbacher *et al.*, 2014) and biosynthesis of lignans (via phenylcoumaran benzylic ether  
388 reductases, *PBR* (Macrae & Towers, 1984)). And while *PBR* *PicglPPR05* was associated  
389 with attack rates, there was also evidence that this gene was tightly regulated by a secondary  
390 growth related transcription factor (*myb20*), and showed decreases in steady-state transcript  
391 abundance with increased growth rates (Porth *et al.*, 2011), interestingly, with a positive  
392 effect on genetic resistance (Table S4). *CYP750* members were related to weevil resistance  
393 (Porth *et al.*, 2011) but also to growth traits with differentially correlated gene expression.  
394 Although such conifer-specific P450 members are supposedly involved in a wide range of  
395 derivatization reactions in phenylpropanoid metabolism, their exact functions need yet to be  
396 ascertained. Dedicated tannin related and downstream regulated genes showed either no or a  
397 positive relationship with growth rate (Table S2) suggesting similar findings as a previous  
398 study that failed to relate tannin production to a trade-off (Haering *et al.*, 2008). This pattern  
399 was opposite to the above mentioned early flavonoid pathway gene *CYP75/F3'H* expression  
400 implicated in a potential trade-off. Possible reasons for such trade-off are the cross-talk  
401 between the lignin and the flavonoid pathways (metabolic plasticity (Mouradov &  
402 Spangenberg, 2014)) and the additional role flavonoids play in plant development (auxin

403 transport: Taylor & Grotewold, 2005). In addition, other studies exist, which showed trade-  
404 offs based on phenylpropanoids and condensed tannins, particularly under stress conditions  
405 that would change plants' allocation choices (e.g. pine trees: Sampedro *et al.*, 2011;  
406 Salicaceous trees: McKown *et al.*, 2014). Because of such interrelations, further  
407 investigations are warranted that also test for plants' growth-defense relationships under  
408 different stress conditions, including such comparisons for constitutive vs induced chemical  
409 defenses (see also below).

410

#### 411 Reproductive Development

412 We identified spruce MADS-box genes that are candidates for reproductive maturity or  
413 reproductive meristem identity in conifers [annotated as *AGL20* (*Suppressor of*  
414 *Overexpression of Constans 1*), *SOC1*-like gene *AGL42*, and *AGL2* (*SEPALLATA1*) based on  
415 sequence homology with *Arabidopsis* genes] (Katahata *et al.*, 2014; Uddenberg *et al.*, 2013;  
416 Melzer *et al.*, 2010) which are paralogs of flowering genes in *Arabidopsis*. As there are no  
417 *SEPI* genes in gymnosperms, the identified *P. glauca* gene WS00823\_F11 is likely the  
418 ortholog of *P. abies DEFICIENS AGAMOUS-LIKE1* (PgMADS10\_DAL1, with proposed  
419 function in regulating the transition from juvenile to adult phase in *Picea* (Carlsbecker *et al.*,  
420 2004)), and which is located within the *SEPI* sister clade more closely related to *AGL6*.  
421 Likewise, *SOC1* and *SOC1*-like annotated *P. glauca* genes, WS0056\_A03 and  
422 WS00922\_C06, respectively, are homologs of *P. abies DAL3* (PaMADS7\_DAL3 (Melzer *et*  
423 *al.*, 2010)). Functional analysis of *CjMADS14*, the *Cryptomeria japonica* ortholog of *P. abies*  
424 *DAL1*, and *CjMADS15*, the *C. japonica* ortholog of *P. abies DAL3*, indicated that expression  
425 of *DAL1* is specific to the reproductive organs (and its function is related to suppressing  
426 reproductive repressors), while expression of *DAL3* is more ubiquitous but included male and  
427 female strobili (Katahata *et al.*, 2014; Niu *et al.*, 2016).

428 In both the negative and the positive correlation networks, we found the *P. glauca*  
429 *DAL3* homolog WS00922\_C06, as well as the *P. glauca DAL1* gene and the other *P. glauca*  
430 *DAL3* homolog, WS0056\_A03. Expression of the *P. glauca DAL3* homolog WS0056\_A03  
431 showed significant increases in steady-state transcript abundance in fast growing spruce  
432 individuals ( $q < 0.05$ ) (conversely to *DAL1* whose expression pattern was unaffected in either  
433 direction by growth) and its expression was associated with the identified growth-resistance  
434 trade-off, while the second *DAL3* homolog was significantly down-regulated in fast growers  
435 ( $q < 0.05$ ) and part of the negative correlation between growth and attack (Fig. 2B). These

436 results are indicative of opposing functions of the two *DAL3* homologs and a striking  
437 example of subfunctionalization in the extensively expanded and duplicated clade of TM3-  
438 like genes in *Pinaceae* (Gramzow *et al.*, 2014). Interestingly, *DAL3* is closely related to the  
439 *P. abies acrocona* (*acr42124\_1/DAL19*) gene, which promotes early cone-setting  
440 (Uddenberg *et al.*, 2013), and to which WS0056\_A03 would be the closest of the two white  
441 spruce homologs. It is important to mention here that similar to the *P. abies acrocona*  
442 phenotype (Uddenberg *et al.*, 2013), an enhanced WS0056\_A03 expression is also negatively  
443 correlated with expression of genes involved in cell wall modification, cell signaling, and  
444 plant stress response (Fig. 2A and Table S3). Such gene expression pattern was identified as a  
445 trade-off between enhanced growth and weevil resistance.

446

#### 447 Different genomic introgression patterns in Interior spruce

448 We would like to highlight the putatively different genomic introgression patterns among the  
449 studied *P. glauca* x *P. engelmannii* hybrid progeny as one possibility to explain the  
450 differences in the relationship between growth and resistance among individuals, as, for  
451 example, it is known that pure *P. glauca* grows at different rates than pure *P. engelmannii* or  
452 their respective hybrids, and this relationship also differs for different life-history stages;  
453 while *P. glauca* initially grows more slowly, it outpaces *P. engelmannii* after tree age 10 (De  
454 La Torre *et al.*, 2014). Current tree breeding programs select towards more vigorous trees  
455 thus higher *P. glauca* ancestry, and concurrently restrict the downward displacement of  
456 Engelmann spruce seedlots due to increased weevil susceptibility. We point out that there  
457 may be differences in selection pressure on the pure species, as low elevation populations are  
458 much more resistant to weevils than their high elevation counterparts (which mainly consist  
459 of *P. engelmannii*), where weevils cannot thrive. However, there is currently no scientific  
460 evidence for significant differences in weevil resistance between the pure species (B. Jaquish,  
461 personal obs.).

462

#### 463 Conclusions and prospects

464 Research on the relationships between plant growth and defenses against herbivory is timely,  
465 especially, when physiological with molecular approaches are combined to predict trade-offs  
466 (Züst & Agraval, 2017). Thus, for functional genomics studies of host defense mechanisms  
467 deployed against herbivores, it is important to consider inherent growth characteristics of the  
468 host. This research has not received enough attention in forest trees, although tree breeding



469 strategies seek to optimize the growth-defense balance, and ideally maximize for both growth  
470 and defense. Such obtained knowledge is particularly important for conifer trees species,  
471 which are widely planted and are already undergoing advanced generation breeding  
472 programs, in contrast to deciduous tree species, such as poplars.

473         Here, we used partial correlation analysis to identify the key genes and network nodes  
474 based on gene expression associated with phenotypic and genetic variability in the context of  
475 tree resistance to a major pest. Overall, our study did not show a trade-off between high  
476 growth rates and defenses. Nevertheless, important environmental components could  
477 influence the relationship between growth and pest resistance. Previously assessed  
478 phenotypic correlations that were found to be largely positive between shoot growth and  
479 susceptibility against weevil attacks would indeed hint at underlying environmental  
480 components. To further untangle the gene regulatory networks underlying the conifer tree's  
481 life history strategy, we are now investigating *ABCG40/PDR12* gene expression after  
482 wounding, under the alternative conditions of (1) drought stress, and (2) no drought stress  
483 imposed. It has been postulated that drought stressed conifers can rely more on constitutive  
484 than on induced defenses. If this candidate gene is involved with the trade-off, we can further  
485 characterize the role of *ABCG40* in relation to stress, and perhaps, separate the role of  
486 constitutive versus induced responses. We can also immediately apply such knowledge to  
487 breeding efforts against the stem boring pest, particularly for known local stress conditions,  
488 such as drought.

489

490 ACKNOWLEDGEMENTS

491

492 This work was supported by Genome BC, Genome Canada, and the Province of BC (Conifer  
493 Forest Health Genomics grant to K.R.). We acknowledge Dr. Carol Ritland for project  
494 management. We thank the technical staff of the Ritland lab. We further thank Dr. René  
495 Alfaro (Canadian Forest Service) for phenotypic data provision.

496

497 AUTHORS' CONTRIBUTIONS

498

499 I.P., B.J. and K.R. performed experiments, conducted fieldwork, and analyzed data. R.W.  
500 provided statistical assistance. I.P. and K.R. drafted the manuscript. K.R. and I.P. planned  
501 and designed the research.

502

503 REFERENCES

504

505 **Alfaro RI. 1995.** An induced defense reaction in white spruce to attack by the white-pine weevil,  
506 *Pissodes strobi*. *Canadian Journal of Forest Research-Revue Canadienne De Recherche*  
507 *Forestiere* **25**(10): 1725-1730.

508 **Alfaro RI, He FL, Tomlin E, Kiss G. 1997.** White spruce resistance to white pine weevil  
509 related to bark resin canal density. *Canadian Journal of Botany-Revue Canadienne De*  
510 *Botanique* **75**(4): 568-573.

511 **Alfaro RI, VanAkker L, Jaquish B, King J. 2004.** Weevil resistance of progeny derived from  
512 putatively resistant and susceptible interior spruce parents. *Forest Ecology and*  
513 *Management* **202**(1-3): 369-377.

514 **Alfaro RI, King JN, Brown RG, Buddingh SM. 2008.** Screening of Sitka spruce genotypes for  
515 resistance to the white pine weevil using artificial infestations. *Forest Ecology and*  
516 *Management* **255**(5-6): 1749-1758.

517 **Bauce E, Kumbasli M, Van Frankenhuyzen K, Carisey N. 2006.** Interactions among white  
518 spruce tannins, *Bacillus thuringiensis* subsp *kurstaki*, and spruce budworm (Lepidoptera :  
519 Tortricidae), on larval survival, growth, and development. *Journal of Economic*  
520 *Entomology* **99**(6): 2038-2047.

521 **Bryant JP, Chapin FS III, Klein DR. 1983.** Carbon/nutrient balance of boreal plants in relation  
522 to vertebrate herbivory. *Oikos* **40**(3):357-368.

523 **Byun-McKay A, Godard KA, Toudefallah M, Martin DM, Alfaro R, King J, Bohlmann J,**  
524 **Plant AL. 2006.** Wound-induced terpene synthase gene expression in sitka spruce that  
525 exhibit resistance or susceptibility to attack by the white pine weevil. *Plant Physiology*  
526 **140**(3): 1009-1021.

527 **Campbell EJ, Schenk PM, Kazan K, Penninckx I, Anderson JP, Maclean DJ, Cammue**  
528 **BPA, Ebert PR, Manners JM. 2003.** Pathogen-responsive expression of a putative  
529 ATP-binding cassette transporter gene conferring resistance to the diterpenoid sclareol is  
530 regulated by multiple defense signaling pathways in *Arabidopsis*. *Plant Physiology*  
531 **133**(3): 1272-1284.

532 **Carlsbecker A, Tandre K, Johanson U, Englund M, Engstrom P. 2004.** The MADS-box  
533 gene *DAL1* is a potential mediator of the juvenile-to-adult transition in Norway spruce  
534 (*Picea abies*). *Plant Journal* **40**(4): 546-557.

535 **De La Torre AR, Wang T, Jaquish B, Aitken SN. 2014.** Adaptation and exogenous selection  
536 in a *Picea glauca* x *Picea engelmannii* hybrid zone: implications for forest management  
537 under climate change. *New Phytologist* **201**(2): 687-699.

538 **Franceschi VR, Krokene P, Christiansen E, Kreckling T. 2005.** Anatomical and chemical  
539 defenses of conifer bark against bark beetles and other pests. *New Phytologist* **167**(2):  
540 353-375.

541 **Friedmann M, Ralph SG, Aeschliman D, Zhuang J, Ritland K, Ellis BE, Bohlmann J,**  
542 **Douglas CJ. 2007.** Microarray gene expression profiling of developmental transitions in  
543 Sitka spruce (*Picea sitchensis*) apical shoots. *Journal of Experimental Botany* **58**(3): 593-  
544 614.

545 **Futuyma DJ, Agrawal AA. 2009.** Macroevolution and the biological diversity of plants and  
546 herbivores. *Proceedings of the National Academy of Sciences of the United States of*  
547 *America* **106**(43): 18054-18061.

- 548 **Gramzow L, Weilandt L, Theissen G. 2014.** MADS goes genomic in conifers: towards  
549 determining the ancestral set of MADS-box genes in seed plants. *Annals of botany*  
550 **114**(7): 1407-1429.
- 551 **Haering DA, Huber MJ, Suter D, Edwards PJ, Luescher A. 2008.** Plant Enemy-derived  
552 Elicitors Increase the Foliar Tannin Concentration of *Onobrychis viciifolia* Without a  
553 Trade-off to Growth. *Annals of Botany* **102**(6): 979-987.
- 554 **Hammerbacher A, Paetz C, Wright LP, Fischer TC, Bohlmann J, Davis AJ, Fenning TM,**  
555 **Gershenzon J, Schmidt A. 2014.** Flavan-3-ols in Norway Spruce: Biosynthesis,  
556 Accumulation, and Function in Response to Attack by the Bark Beetle-Associated  
557 Fungus *Ceratocystis polonica*. *Plant Physiology* **164**(4): 2107-2122.
- 558 **He FL, Alfaro RI. 2000.** White pine weevil attack on white spruce: A survival time analysis.  
559 *Ecological Applications* **10**(1): 225-232.
- 560 **Hermes DA, Mattson WJ. 1992.** The dilemma of plants: To grow or defend. *Quarterly Review*  
561 *of Biology* **67**(3): 283-335. **Hofer R, Boachon B, Renault H, Gavira C, Miesch L,**  
562 **Iglesias J, Ginglinger J-F, Allouche L, Miesch M, Grec S, Larbat R, Werck-**  
563 **Reichhart D. 2014.** Dual Function of the Cytochrome P450 CYP76 Family from  
564 *Arabidopsis thaliana* in the Metabolism of Monoterpenols and Phenylurea Herbicides.  
565 *Plant physiology* **166**(3): 1149-1161.
- 566 **Howe GA, Jander G 2008.** Plant immunity to insect herbivores. *Annual Review of Plant*  
567 *Biology*. Palo Alto: Annual Reviews, 41-66.
- 568 **Howe GA, Schaller A 2008.** Direct Defences in Plants and Their Induction by Wounding and  
569 Insect Herbivores. In: Schaller A ed. *Induced Plant Resistance to Herbivory*: Springer, 7-  
570 29.
- 571 **Huber W, von Heydebreck A, Sultmann H, Poustka A, Vingron M. 2002.** Variance  
572 stabilization applied to microarray data calibration and to the quantification of differential  
573 expression. *Bioinformatics* **18**: S96-S104.
- 574 **Huot B, Yao J, Montgomery BL, He SY. 2014.** Growth-Defense Trade-offs in Plants: A  
575 Balancing Act to Optimize Fitness. *Molecular Plant* **7**(8): 1267-1287.
- 576 **Johansson A, Loset M, Mundal SB, Johnson MP, Freed KA, Fenstad MH, Moses EK,**  
577 **Austgulen R, Blangero J. 2011.** Partial correlation network analyses to detect altered  
578 gene interactions in human disease: using preeclampsia as a model. *Human Genetics*  
579 **129**(1): 25-34.
- 580 **Katahata S-I, Futamura N, Igasaki T, Shinohara K. 2014.** Functional analysis of SOC1-like  
581 and AGL6-like MADS-box genes of the gymnosperm *Cryptomeria japonica*. *Tree*  
582 *Genetics & Genomes* **10**(2): 317-327.
- 583 **Kazan K, Manners JM. 2008.** Jasmonate signaling: Toward an integrated view. *Plant*  
584 *Physiology* **146**(4): 1459-1468.
- 585 **Keeling CI, Weisshaar S, Ralph SG, Jancsik S, Hamberger B, Dullat HK, Bohlmann J.**  
586 **2011.** Transcriptome mining, functional characterization, and phylogeny of a large  
587 terpene synthase gene family in spruce (*Picea* spp.). *BMC Plant Biology* **11**:43.
- 588 **Kenett DY, Tumminello M, Madi A, Gur-Gershgoren G, Mantegna RN, Ben-Jacob E.**  
589 **2010.** Dominating Clasp of the Financial Sector Revealed by Partial Correlation Analysis  
590 of the Stock Market. *PLoS ONE* **5**(12): e15032.
- 591 **King JN, Yanchuk AD, Kiss GK, Alfaro RI. 1997.** Genetic and phenotypic relationships  
592 between weevil (*Pissodes strobi*) resistance and height growth in spruce populations of

- 593 British Columbia. *Canadian Journal of Forest Research-Revue Canadienne De*  
594 *Recherche Forestiere* **27**(5): 732-739.
- 595 **Kiss G, Yeh FC. 1987.** Heritability estimates for height for young interior spruce in British  
596 Columbia. *Canadian Journal of Forest Research-Revue Canadienne De Recherche*  
597 *Forestiere* **18**:158–162.
- 598 **Kiss GK, Yanchuk AD. 1991.** Preliminary evaluation of genetic-variation of weevil resistance  
599 in interior spruce in British-Columbia. *Canadian Journal of Forest Research-Revue*  
600 *Canadienne De Recherche Forestiere* **21**(2): 230-234.
- 601 **Kolossova N, Miller B, Ralph S, Ellis BE, Douglas C, Ritland K, Bohlmann J. 2004.** Isolation  
602 of high-quality RNA from gymnosperm and angiosperm trees. *Biotechniques* **36**(5): 821-  
603 824.
- 604 **Kolossova N. 2010.** *Transcriptome analysis of conifer defense against bark beetle-associated*  
605 *blue-stain fungi and white pine weevil.* University of British Columbia Vancouver. 223  
606 pages.
- 607 **Lieutier F, Brignolas F, Sauvard D, Yart A, Galet C, Brunet M, van de Syde H. 2003.** Intra-  
608 and inter-provenance variability in phloem phenols of *Picea abies* and relationship to a  
609 bark beetle-associated fungus. *Tree Physiology* **23**(4): 247-256.
- 610 **Lippert D, Chowrira S, Ralph SG, Zhuang J, Aeschliman D, Ritland C, Ritland K,**  
611 **Bohlmann J. 2007.** Conifer defense against insects: Proteome analysis of Sitka spruce  
612 (*Picea sitchensis*) bark induced by mechanical wounding or feeding by white pine  
613 weevils (*Pissodes strobi*). *Proteomics* **7**(2): 248-270.
- 614 **Macrae WD, Towers GHN. 1984.** Biological-activities of lignans. *Phytochemistry* **23**(6): 1207-  
615 1220.
- 616 **McKay SAB, Hunter WL, Godard KA, Wang SX, Martin DM, Bohlmann J, Plant AL.**  
617 **2003.** Insect attack and wounding induce traumatic resin duct development and gene  
618 expression of (-)-pinene synthase in Sitka spruce. *Plant Physiology* **133**(1): 368-378.
- 619 **McKown AD, Guy RD, Quamme L, Klápště J, La Mantia J, Constabel CP, El-Kassaby**  
620 **YA, Hamelin RC, Zifkin M, Azam MS. 2014.** Association genetics, geography and  
621 ecophysiology link stomatal patterning in *Populus trichocarpa* with carbon gain and  
622 disease resistance trade-offs. *Molecular Ecology* **23**(23): 5771–5790.
- 623 **Melzer R, Wang Y-Q, Theissen G. 2010.** The naked and the dead: The ABCs of gymnosperm  
624 reproduction and the origin of the angiosperm flower. *Seminars in Cell & Developmental*  
625 *Biology* **21**(1): 118-128.
- 626 **Miller B, Madilao LL, Ralph S, Bohlmann J. 2005.** Insect-induced conifer defense. White  
627 pine weevil and methyl jasmonate induce traumatic resinosis, de novo formed volatile  
628 emissions, and accumulation of terpenoid synthase and putative octadecanoid pathway  
629 transcripts in Sitka spruce. *Plant Physiology* **137**(1): 369-382.
- 630 **Mouradov A, Spangenberg G. 2014.** Flavonoids: A Metabolic Network Mediating Plants  
631 Adaptation to Their Real Estate. *Frontiers in Plant Science* **5**: 620.
- 632 **Niu S, Yuan H, Sun X, Porth I, Li Y, El-Kassaby YA, Li W. 2016.** A transcriptomics  
633 investigation into pine reproductive organ development. *New Phytologist* **209**(3): 1278-  
634 1289.
- 635 **Porth I, Hamberger B, White R, Ritland K. 2011.** Defense mechanisms against herbivory in  
636 *Picea*: sequence evolution and expression regulation of gene family members in the  
637 phenylpropanoid pathway. *BMC Genomics* **12**(1): 608.

- 638 **Porth I, White R, Jaquish B, Alfaro R, Ritland C, Ritland K. 2012.** Genetical Genomics  
639 Identifies the Genetic Architecture for Growth and Weevil Resistance in Spruce. *PLoS*  
640 *One* **7**(9): e44397.
- 641 **Ralph SG, Yueh H, Friedmann M, Aeschliman D, Zeznik JA, Nelson CC, Butterfield YSN,**  
642 **Kirkpatrick R, Liu J, Jones SJM, Marra MA, Douglas CJ, Ritland K, Bohlmann J.**  
643 **2006.** Conifer defence against insects: microarray gene expression profiling of Sitka  
644 spruce (*Picea sitchensis*) induced by mechanical wounding or feeding by spruce  
645 budworms (*Choristoneura occidentalis*) or white pine weevils (*Pissodes strobi*) reveals  
646 large-scale changes of the host transcriptome. *Plant Cell and Environment* **29**(8): 1545-  
647 1570.
- 648 **Ralph SG, Jancsik S, Bohlmann J. 2007.** Dirigent proteins in conifer defense II: Extended gene  
649 discovery, phylogeny, and constitutive and stress-induced gene expression in spruce  
650 (*Picea* spp.). *Phytochemistry* **68**(14): 1975-1991.
- 651 **Sampedro L, Moreira X, Zas R. 2011.** Costs of constitutive and herbivore-induced chemical  
652 defenses in pine trees emerge only under low resources availability. *Journal of Ecology*  
653 **99**(3): 818–827
- 654 **Steppuhn A, Baldwin I 2008.** Induced defenses and the cost-benefit paradigm. In: Schaller A  
655 ed. *Induced Plant Resistance to Herbivory*: Springer, pp. 61-83.
- 656 **Storey JD, Tibshirani R. 2003.** Statistical significance for genomewide studies. *Proceedings of*  
657 *the National Academy of Sciences of the United States of America* **100**(16): 9440-9445.
- 658 **Sun S, Yu J-P, Chen F, Zhao T-J, Fang X-H, Li Y-Q, Sui S-F. 2008.** TINY, a dehydration-  
659 responsive element (DRE)-binding protein-like transcription factor connecting the DRE-  
660 and ethylene-responsive element-mediated signaling pathways in Arabidopsis. *Journal of*  
661 *Biological Chemistry* **283**(10): 6261-6271.
- 662 **Taylor LP, Grotewold E. 2005.** Flavonoids as developmental regulators. *Current Opinion in*  
663 *Plant Biology* **8**(3): 317-323.
- 664 **Thaler JS, Farag MA, Pare PW, Dicke M. 2002.** Jasmonate-deficient plants have reduced  
665 direct and indirect defences against herbivores. *Ecology Letters* **5**(6): 764-774.
- 666 **Tomlin ES, Alfaro RI, Borden JH, He FL. 1998.** Histological response of resistant and  
667 susceptible white spruce to simulated white pine weevil damage. *Tree Physiology* **18**(1):  
668 21-28.
- 669 **Turtola S, Manninen AM, Rikala R, Kainulainen P. 2003.** Drought Stress Alters the  
670 Concentration of Wood Terpenoids in Scots Pine and Norway Spruce Seedlings. *Journal*  
671 *of Chemical Ecology* **29**(9): 1981-1995.
- 672 **Uddenberg D, Reimegard J, Clapham D, Almqvist C, von Arnold S, Emanuelsson O,**  
673 **Sundstrom JF. 2013.** Early Cone Setting in *Picea abies* acrocona Is Associated with  
674 Increased Transcriptional Activity of a MADS Box Transcription Factor. *Plant*  
675 *Physiology* **161**(2): 813-823.
- 676 **van den Brule S, Smart CC. 2002.** The plant PDR family of ABC transporters. *Planta* **216**(1):  
677 95-106.
- 678 **vanAkker L, Alfaro RI, Brockley R. 2004.** Effects of fertilization on resin canal defences and  
679 incidence of *Pissodes strobi* attack in interior spruce. *Canadian Journal of Forest*  
680 *Research-Revue Canadienne De Recherche Forestiere* **34**(4): 855-862.
- 681 **Verne S, Jaquish B, White R, Ritland C, Ritland K. 2011.** Global Transcriptome Analysis of  
682 Constitutive Resistance to the White Pine Weevil in Spruce. *Genome Biology and*  
683 *Evolution* **3**: 851-867.

- 684 **Worley AC, Houle D, Barrett SCH. 2003.** Consequences of hierarchical allocation for the  
685 evolution of life-history traits. *American Naturalist* **161**(1): 153-167.
- 686 **Züst T, Agrawal AA. 2017.** Trade-offs between plant growth and defense against insect  
687 herbivory: an emerging mechanistic synthesis. *Annual Reviews of Plant Biology* **68**: 513-  
688 534.  
689

690 SUPPORTING INFORMATION

691

692 **Figure S1:** Correlation structure for significant genetic correlations among 18 individual host  
693 tree characteristics.

694 **Figure S2:** Transcriptome changes for the two-by-two factorial R\*S spruce progeny in terms of  
695 partial correlations.

696 **Table S1:** Full list of correlation results of gene expression for the two-by-two factorial R\*S  
697 spruce progeny and for the 10 quantitative traits.

698 **Table S2:** Effect of inherent growth rate variation on global transcriptome changes for the two-  
699 by-two factorial R\*S spruce progeny.

700 **Table S3:** Gene id's of the 21-member compact network ( $P=0.004$ ).

701 **Table S4:** Gene id's of the 166-member compact network ( $P=0.004$ ).

702 **Table S5:** Top100+ transcripts, among all four pairwise growth-resistance trait comparisons.

703 **Table S6:** Top100- transcripts, among all four pairwise growth-resistance trait comparisons.

704 **Notes S1:** Partial correlations for the two-by-two factorial R\*S spruce progeny.

705 **Notes S2:** Correlation network 21+, full results.

706 **Notes S3:** Correlation network 166-, full results.

707



708 FIGURE LEGENDS

709

710 **Figure 1:** The joint distribution of gene expression in relation to growth (leader length in yr  
711 1999) and susceptibility (number of attacks in yrs 2000 and 2001).

712 **Caption Figure 1:** Only ESTs that showed associations with a permutation probably of 0.01 or  
713 lower are shown. The two ends, which have unshaded circles, illustrate the two groups (*i.e.* the  
714 upward bounds in the positive or negative direction of correlations, respectively) that could be  
715 subject to separate partial correlation analysis (as demonstrated in the present study).

716 **Figure 2:** Trade-off vs No trade-off scenarios testing between spruce tree growth and host's  
717 weevil pest resistance for the two-by-two factorial R\*S spruce progeny uncovered by correlating  
718 the expression of 13,980 (annotated) spruce genes in bark tissue of the apical shoot with host tree  
719 height growth and host resistance towards the weevil phenotypes.

720 **Caption Figure 2:**

721 In both networks, correlation coefficient cutoffs of 0.197 were employed (Notes S2 and S3 show  
722 entire results); the social networks were visualized using Pajek ([vlado.fmf.uni-  
723 lj.si/pub/networks/pajek/](http://vlado.fmf.uni-lj.si/pub/networks/pajek/)) employing the Fruchterman-Reingold approach; dashed lines represent  
724 *negative* correlations, solid lines represent *positive* correlations. **A**, Correlation network  
725 representative of the *positive* genetic correlations between host tree growth and pest attack  
726 among individual traits involving height at age 5 (yr 1999), apical leader length in yr 1999 (green  
727 vertices), total attacks and a total number of egg plugs (yrs 2000-2001) (red vertices) and 21  
728 gene transcripts ( $P=0.004$ ) (black vertices, except the spruce *acrocona* ortholog is shown in  
729 magenta). Spruce element annotations are provided in Table S3. **B**, Correlation network  
730 representative of the *negative* genetic correlations between host tree growth and pest attack  
731 among individual traits involving height at age 5 (yr 1999), apical leader length in yr 1999 (green  
732 vertices), total attacks and a total number of egg plugs (yrs 2000-2001) (red vertices) and 166  
733 gene transcripts ( $P=0.004$ ) (black vertices, except the spruce *PDR12* ortholog is shown in blue).  
734 Spruce element annotations are provided in Table S4.

735 TABLES

736

737 **Table 1:** Number of significant correlations ( $P < 0.05$ ; 1,000 randomizations) between gene  
738 expression levels testing 13,980 spruce genes and 10 phenotypic traits related to tree height and  
739 weevil resistance, respectively, for the two-by-two factorial R\*S spruce progeny.

| trait   | positive | negative | both  | proportion<br>positive |
|---------|----------|----------|-------|------------------------|
| ldr_99  | 1,827    | 1,553    | 3,380 | 0.540                  |
| init_Ht | 844      | 949      | 1,793 | 0.471                  |
| Ht_3yrs | 925      | 719      | 1,644 | 0.563                  |
| Ht_5yrs | 2,118    | 1,968    | 4,086 | 0.518                  |
| atk00   | 933      | 1,021    | 1,954 | 0.477                  |
| atk01   | 521      | 630      | 1,151 | 0.453                  |
| atktot  | 996      | 1,116    | 2,112 | 0.472                  |
| egg00   | 640      | 907      | 1,547 | 0.414                  |
| egg01   | 474      | 494      | 968   | 0.490                  |
| eggtot  | 846      | 993      | 1,839 | 0.460                  |

740 **Caption Table 1:**

741 Key: ldr99: apical leader length in yr 1999; Init\_Ht: initial tree height in yr 1995; Ht\_3yrs: tree  
742 height in yr 1997; Ht\_5yrs: tree height in yr 1999; atk00: attacks in yr 2000; atk01: attacks in yr  
743 2001; atktot: total attacks summed over yrs 2000 and 2001; egg00: oviposition in yr 2000;  
744 egg01: oviposition in yr 2001; eggtot: total oviposition summed over yrs 2000 and 2001.

745 **Table 2:** Partial correlations between growth and susceptibility for the two-by-two factorial R\*S  
 746 spruce progeny.

| Groups    | Trait pairs         |                    |                    |                     |                     |                    |
|-----------|---------------------|--------------------|--------------------|---------------------|---------------------|--------------------|
|           | ldr_99 x<br>Ht_5yrs | ldr_99 x<br>atktot | ldr_99 x<br>eggtot | Ht_5yrs x<br>atktot | Ht_5yrs x<br>eggtot | atktot x<br>eggtot |
| All       | 0.858               | 0.287              | 0.339              | 0.265               | 0.297               | 0.815              |
| Top100+   | 0.845               | 0.121              | 0.185              | 0.029               | 0.138               | 0.777              |
| Top100-   | 0.821               | 0.448              | 0.570              | 0.435               | 0.514               | 0.792              |
| Tight21+  | 0.813               | 0.118              | 0.229              | 0.075               | 0.168               | 0.785              |
| Tight166- | 0.743               | 0.075              | 0.211              | 0.215               | 0.128               | 0.568              |

747 **Caption Table 2:**

748 **Key:** ldr99: apical leader length in yr 1999; Ht\_5yrs: tree height in yr 1999; atktot: total attacks  
 749 summed over yrs 2000 and 2001; eggtot: total oviposition summed over yrs 2000 and 2001, in  
 750 the set of four crosses, grouped by partial correlation analysis where only expression elements  
 751 with the highest effects on the partial correlation either in the positive direction (+) or negative  
 752 direction (-) are included in the groups, in groups of size 21, 100 and 166.

753 **Table 3:** Twenty-eight most significant transcripts from gene expression correlations for the two-by-two factorial R\*S spruce progeny  
 754 with Ldr99, Ht99, atk00, atktot, egg00, eggtot phenotypes ( $P$ -value < 0.05 in bold; 1,000 permutations), sorted by overall significance  
 755 among all 13,980 tested transcripts (see Table S1).

| Query ID      | E-value   | AGI #     | Annotation                                                      | Ldr99         | Ht99          | atk00         | atktot        | egg00         | eggtot        | Overall $P$ -value |
|---------------|-----------|-----------|-----------------------------------------------------------------|---------------|---------------|---------------|---------------|---------------|---------------|--------------------|
| WS0269_K02#‡  | 6.60E-154 | AT1G15520 | ATPDR12<br>(pleiotropic drug resistance 12)                     | <b>0.170</b>  | <b>0.224</b>  | -0.116        | <b>-0.183</b> | <b>-0.142</b> | <b>-0.175</b> | 0.0190             |
| WS00915_B14*  | 2.20E-31  | AT3G19380 | U-boxdomain-<br>containing<br>protein                           | <b>-0.163</b> | <b>-0.193</b> | <b>-0.154</b> | <b>-0.186</b> | <b>-0.188</b> | <b>-0.221</b> | 0.0196             |
| WS0073_B15#‡  | 1.70E-19  | AT3G02890 | PHD finger<br>protein-related                                   | <b>0.136</b>  | <b>0.196</b>  | -0.108        | <b>-0.197</b> | -0.108        | <b>-0.158</b> | 0.0253             |
| WS01031_A08†  | 1.9E-73   | AT5G43940 | Alcohol<br>dehydrogenase 2                                      | <b>0.124</b>  | <b>0.128</b>  | <b>0.249</b>  | <b>0.255</b>  | <b>0.214</b>  | <b>0.246</b>  | 0.0263             |
| WS0094_H14‡   | 5.9E-70   | AT3G10300 | calcium-binding<br>EF hand family<br>protein                    | 0.119         | <b>0.175</b>  | <b>-0.116</b> | <b>-0.175</b> | <b>-0.120</b> | <b>-0.179</b> | 0.0277             |
| WS01041_H21*† | 2.50E-52  | AT4G25835 | AAA-type<br>ATPase family<br>protein                            | <b>-0.160</b> | <b>-0.211</b> | <b>-0.139</b> | <b>-0.183</b> | <b>-0.181</b> | <b>-0.208</b> | 0.0298             |
| WS0093_G14    | 2.7E-30   | AT1G32450 | proton-dependent<br>oligopeptide<br>transport family<br>protein | -0.110        | -0.111        | <b>-0.160</b> | <b>-0.219</b> | <b>-0.223</b> | <b>-0.241</b> | 0.0300             |
| WS0093_H01*†  | 1.80E-52  | AT3G07080 | membrane                                                        | <b>-0.175</b> | <b>-0.231</b> | <b>-0.246</b> | <b>-0.244</b> | <b>-0.184</b> | <b>-0.183</b> | 0.0329             |

|               |          |           |                                              |               |               |               |               |               |               |        |
|---------------|----------|-----------|----------------------------------------------|---------------|---------------|---------------|---------------|---------------|---------------|--------|
|               |          |           | protein                                      |               |               |               |               |               |               |        |
| WS00824_D13#  | 1.10E-90 | AT3G02750 | protein phosphatase 2C family protein        | <b>0.149</b>  | <b>0.222</b>  | 0.118         | <b>0.200</b>  | 0.072         | <b>0.137</b>  | 0.0348 |
| WS0261_D10    | 1.5E-89  | AT4G28250 | ATEXPB3 (Arabidopsis thaliana expansin B3)   | 0.113         | <b>0.149</b>  | <b>0.138</b>  | <b>0.193</b>  | <b>0.159</b>  | <b>0.168</b>  | 0.0356 |
| WS0101_H20    | 7.5E-28  | AT2G44090 | similar to unknown protein [A. thaliana]     | -0.106        | <b>-0.141</b> | <b>-0.174</b> | <b>-0.207</b> | <b>-0.132</b> | <b>-0.201</b> | 0.0365 |
| WS00920_D17*‡ | 2.60E-60 | AT4G39230 | isoflavone reductase, putative               | <b>-0.235</b> | <b>-0.339</b> | 0.082         | <b>0.129</b>  | <b>0.165</b>  | <b>0.200</b>  | 0.0391 |
| WS00933_P08   | 2.3E-24  | AT5G22650 | histone deacetylase 2B                       | <b>-0.130</b> | <b>-0.150</b> | <b>-0.224</b> | <b>-0.211</b> | <b>-0.147</b> | <b>-0.159</b> | 0.0398 |
| WS00812_N05   | 2.2E-30  | AT3G02280 | flavodoxin family protein                    | <b>0.129</b>  | <b>0.144</b>  | 0.113         | <b>0.183</b>  | 0.074         | <b>0.137</b>  | 0.0402 |
| WS00917_A11   | 9.8E-29  | AT2G32060 | 40S ribosomal protein S12                    | <b>-0.222</b> | <b>-0.163</b> | <b>-0.152</b> | <b>-0.209</b> | <b>-0.203</b> | <b>-0.213</b> | 0.0403 |
| WS0039_H23    | 1.2E-30  | AT1G50640 | ethylene responsive element binding factor 3 | <b>-0.128</b> | <b>-0.134</b> | <b>-0.177</b> | <b>-0.198</b> | <b>-0.190</b> | <b>-0.219</b> | 0.0405 |
| WS0091_H20†   | 4.30E-19 | AT3G16640 | translationally controlled tumor protein     | <b>-0.212</b> | <b>-0.196</b> | <b>-0.173</b> | <b>-0.206</b> | <b>-0.136</b> | <b>-0.172</b> | 0.0416 |

|               |          |           |                                                                           |               |               |               |               |               |               |        |
|---------------|----------|-----------|---------------------------------------------------------------------------|---------------|---------------|---------------|---------------|---------------|---------------|--------|
| WS0102_O01    | 1.30E-56 | AT4G31330 | similar to unknown protein                                                | <b>-0.121</b> | <b>-0.163</b> | <b>-0.194</b> | <b>-0.184</b> | <b>-0.193</b> | <b>-0.197</b> | 0.0442 |
| WS0076_N15#   | 2.50E-30 | AT2G28080 | glycosyltransferase family protein                                        | <b>0.191</b>  | <b>0.177</b>  | <b>0.130</b>  | <b>0.141</b>  | <b>0.174</b>  | <b>0.170</b>  | 0.0460 |
| WS0024_M02    | 7.8E-178 | AT5G63890 | histidinol dehydrogenase                                                  | <b>0.155</b>  | <b>0.121</b>  | 0.113         | <b>0.153</b>  | 0.088         | <b>0.157</b>  | 0.0465 |
| WS0076_E13‡   | 5.40E-60 | AT3G26070 | plastid-lipid associated protein PAP / fibrillin family protein           | <b>-0.175</b> | <b>-0.203</b> | 0.089         | <b>0.168</b>  | <b>0.130</b>  | <b>0.188</b>  | 0.0467 |
| WS0264_J01    | 6.8E-92  | AT5G51550 | phosphate-responsive 1 family protein                                     | -0.096        | -0.116        | <b>-0.134</b> | <b>-0.172</b> | <b>-0.138</b> | <b>-0.178</b> | 0.0469 |
| WS0072_P16‡   | 1.7E-49  | AT2G02540 | zinc finger homeodomain 4                                                 | <b>0.133</b>  | <b>0.162</b>  | -0.080        | <b>-0.166</b> | <b>-0.156</b> | <b>-0.198</b> | 0.0478 |
| WS0262_A22    | 1.5E-34  | AT5G56450 | mitochondrial substrate carrier family protein                            | <b>0.144</b>  | <b>0.137</b>  | <b>0.153</b>  | <b>0.218</b>  | <b>0.127</b>  | <b>0.188</b>  | 0.0486 |
| WS00723_G19   | 1.20E-32 | AT5G35170 | adenylate kinase family protein                                           | <b>0.186</b>  | <b>0.173</b>  | <b>0.236</b>  | <b>0.213</b>  | <b>0.171</b>  | <b>0.175</b>  | 0.0488 |
| WS0042_E16‡   | 3.9E-128 | AT2G47470 | PDI-LIKE 2-1, maternal effect embryo arrest 30, unfertilized embryo sac 5 | 0.115         | 0.115         | <b>-0.171</b> | <b>-0.191</b> | <b>-0.161</b> | <b>-0.191</b> | 0.0490 |
| WS00917_K05#† | 5.20E-07 | AT4G30410 | similar to unknown protein                                                | <b>0.315</b>  | <b>0.367</b>  | <b>0.158</b>  | <b>0.166</b>  | <b>0.134</b>  | <b>0.138</b>  | 0.0495 |

|                          |          |           |                                   |               |               |              |              |       |              |        |
|--------------------------|----------|-----------|-----------------------------------|---------------|---------------|--------------|--------------|-------|--------------|--------|
| WS00716_G05 <sup>‡</sup> | 4.80E-14 | AT3G13600 | calmodulin-binding family protein | <b>-0.127</b> | <b>-0.159</b> | <b>0.123</b> | <b>0.175</b> | 0.070 | <b>0.141</b> | 0.0497 |
|--------------------------|----------|-----------|-----------------------------------|---------------|---------------|--------------|--------------|-------|--------------|--------|

756 **Caption Table 3:**

757 <sup>#</sup> Expression of these transcripts showed significant *increases* in steady-state transcript abundance in fast growing individuals ((Porth  
758 *et al.*, 2011) and Table S2).

759 <sup>\*</sup> Expression of these transcripts showed significant *decreases* in steady-state transcript abundance in fast growing individuals ((Porth  
760 *et al.*, 2011) and Table S2).

761 <sup>†</sup> present in 21-member compact partial correlation network ( $P=0.004$ ; Fig. 2A; Table S3), corresponding to trade-off scenario (Fig. 1).

762 <sup>‡</sup> present in 166-member compact partial correlation network ( $P=0.004$ ), Fig. 2B (Table S4; see also Fig. 1).

763 Key: Ldr99: apical leader length in yr 1999; Ht99: height at age 5 (yr 1999), atk00: attacks in yr 2000; atk01: attacks in yr 2000, and  
764 atktot: total attacks; egg00: oviposition in yr 2000; egg01: oviposition in yr 2001, and egttot: total number of egg plugs (yrs 2000-  
765 2001); sequence homology of the spruce cDNA to the respective Genbank entry (BLAST identity, AGI# for AT homolog) is  
766 supported by the expect value (E-value) of the hit.

Normalized correlation of EST with attack

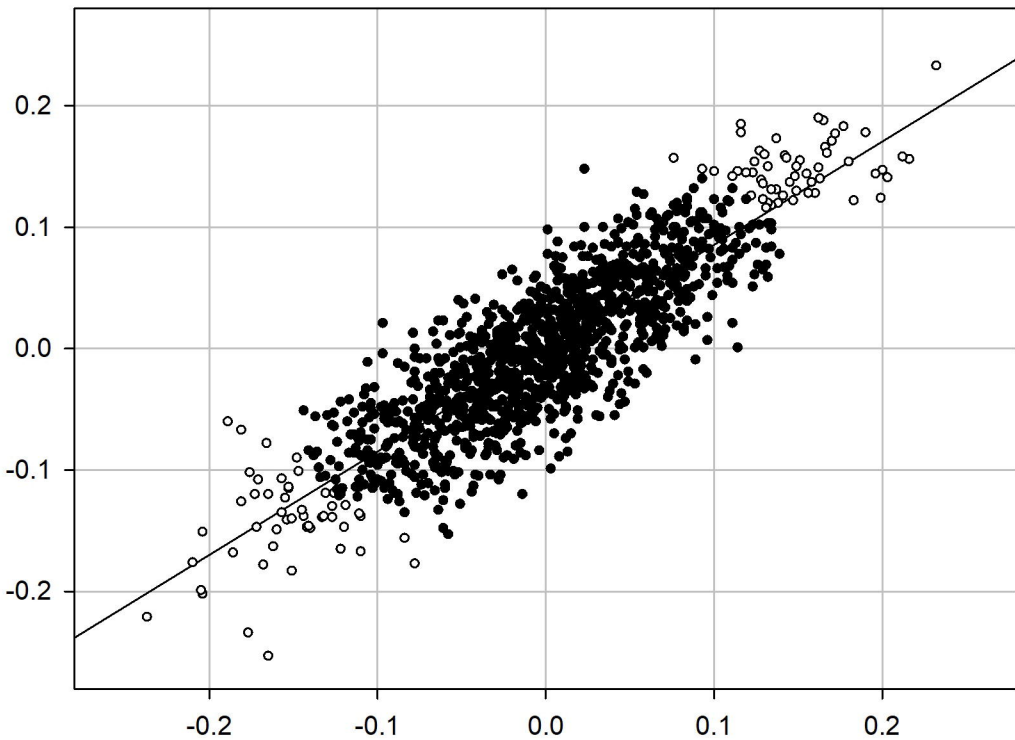

Normalized correlation of EST with growth



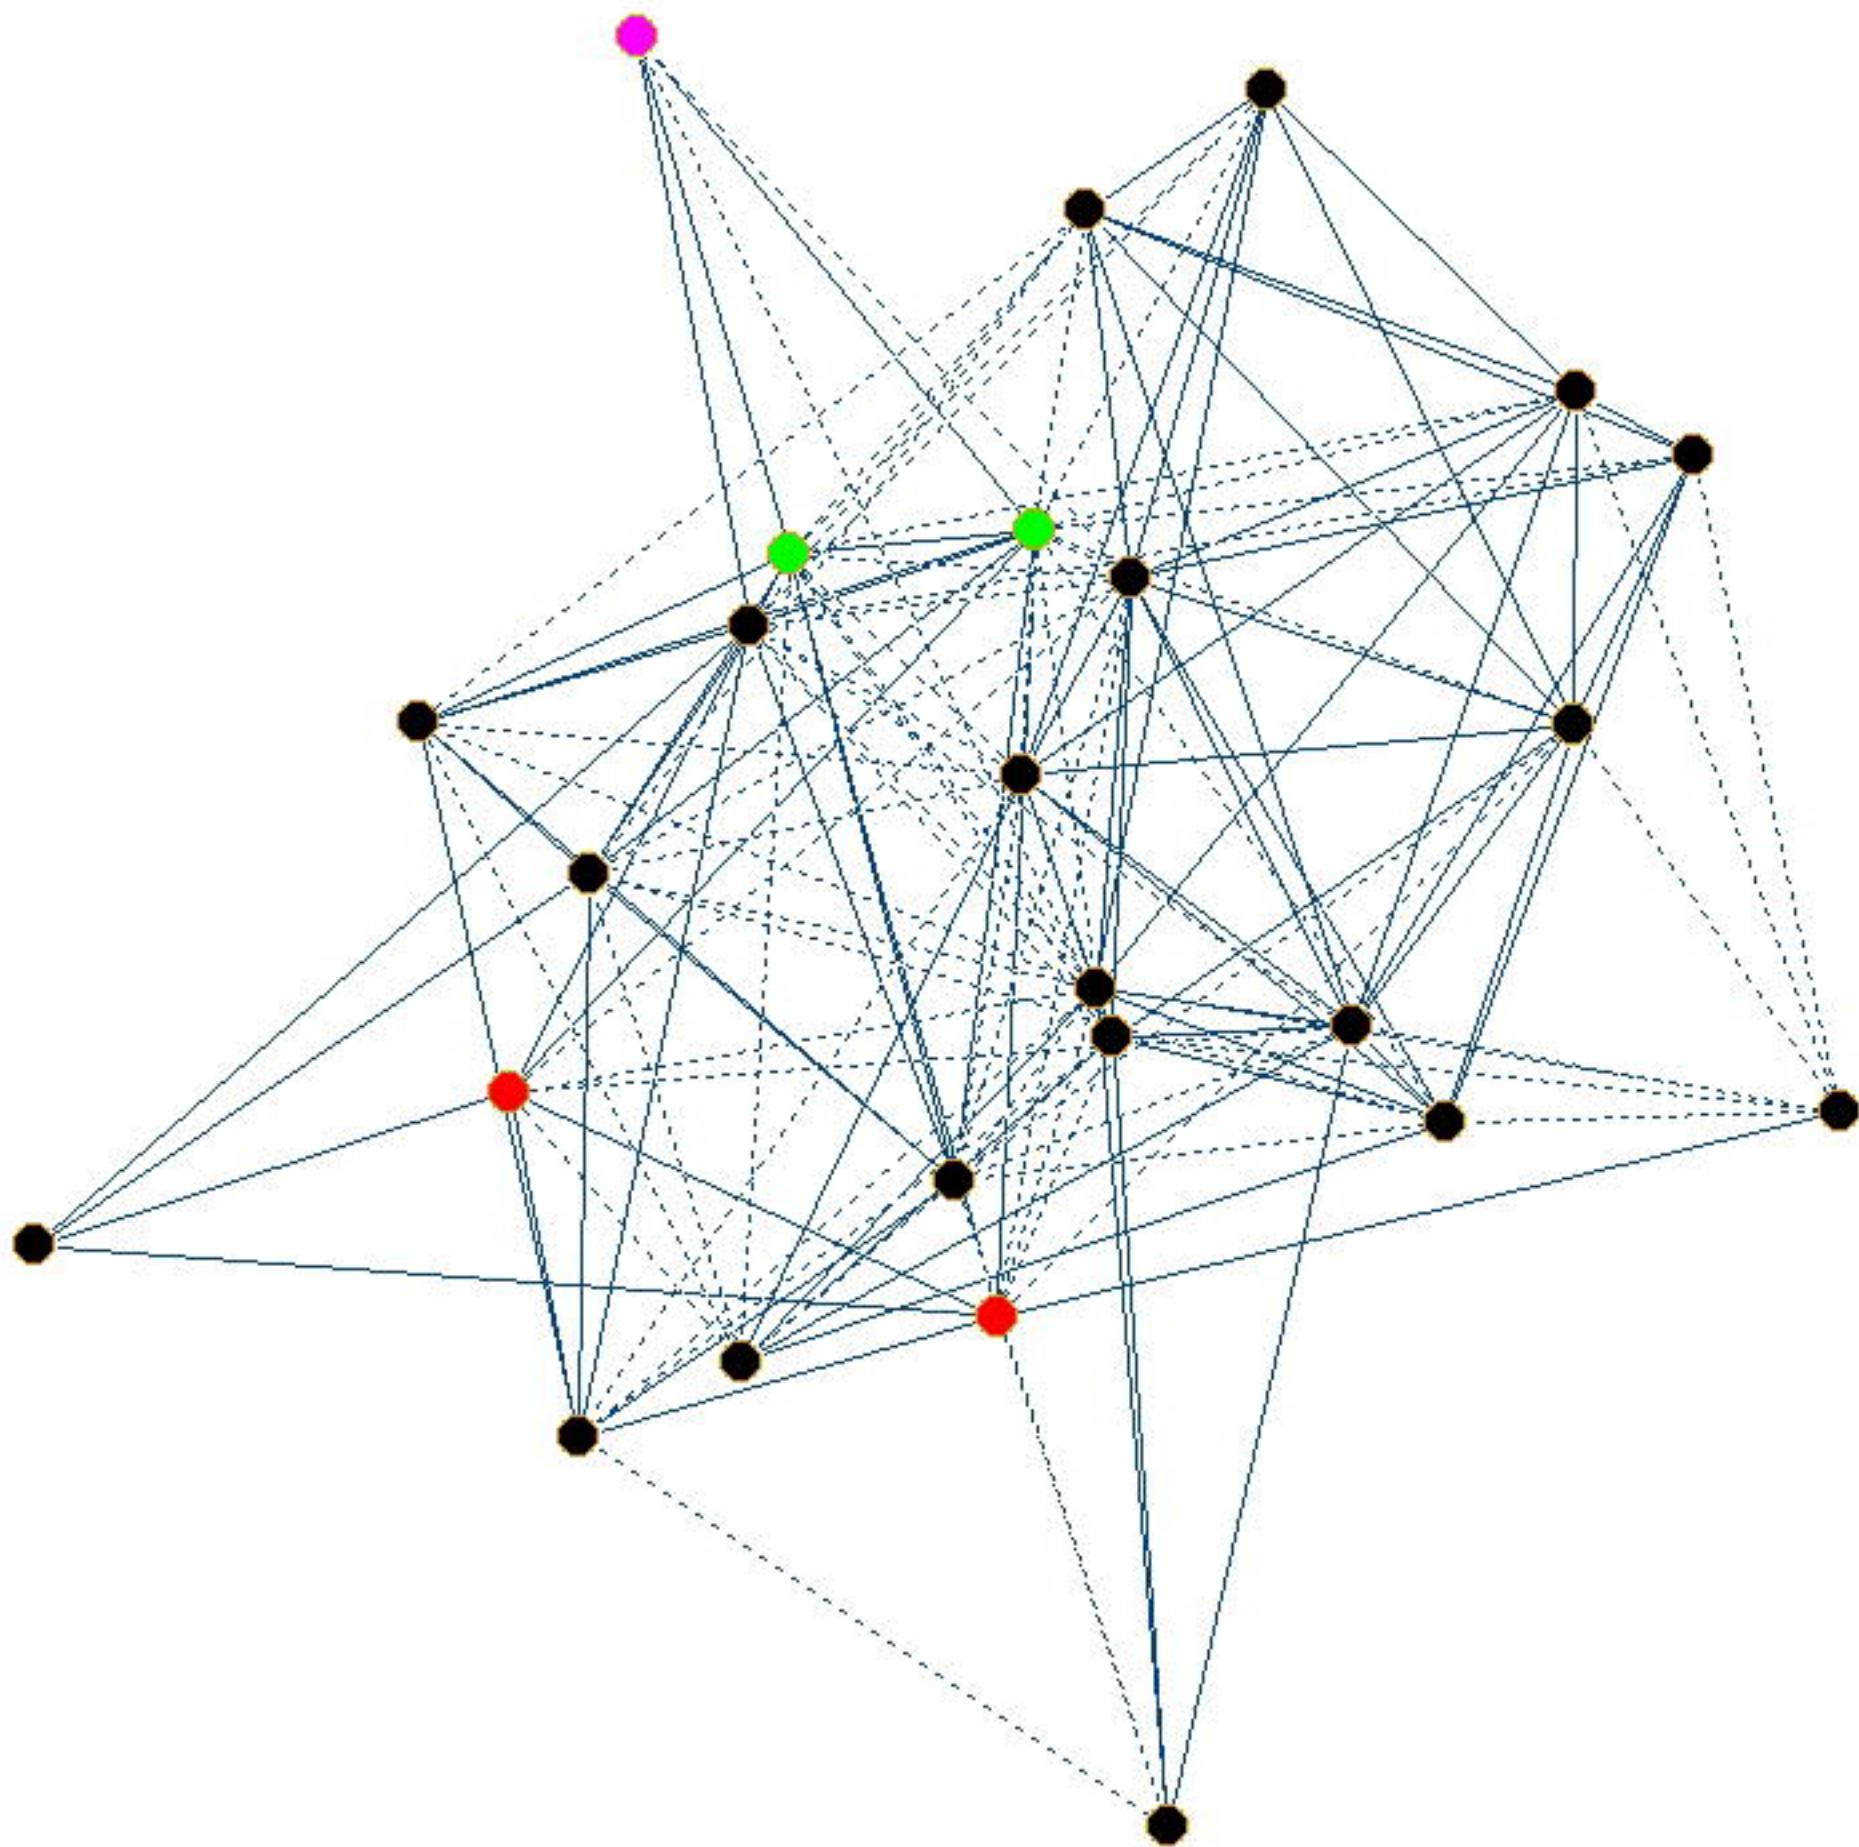

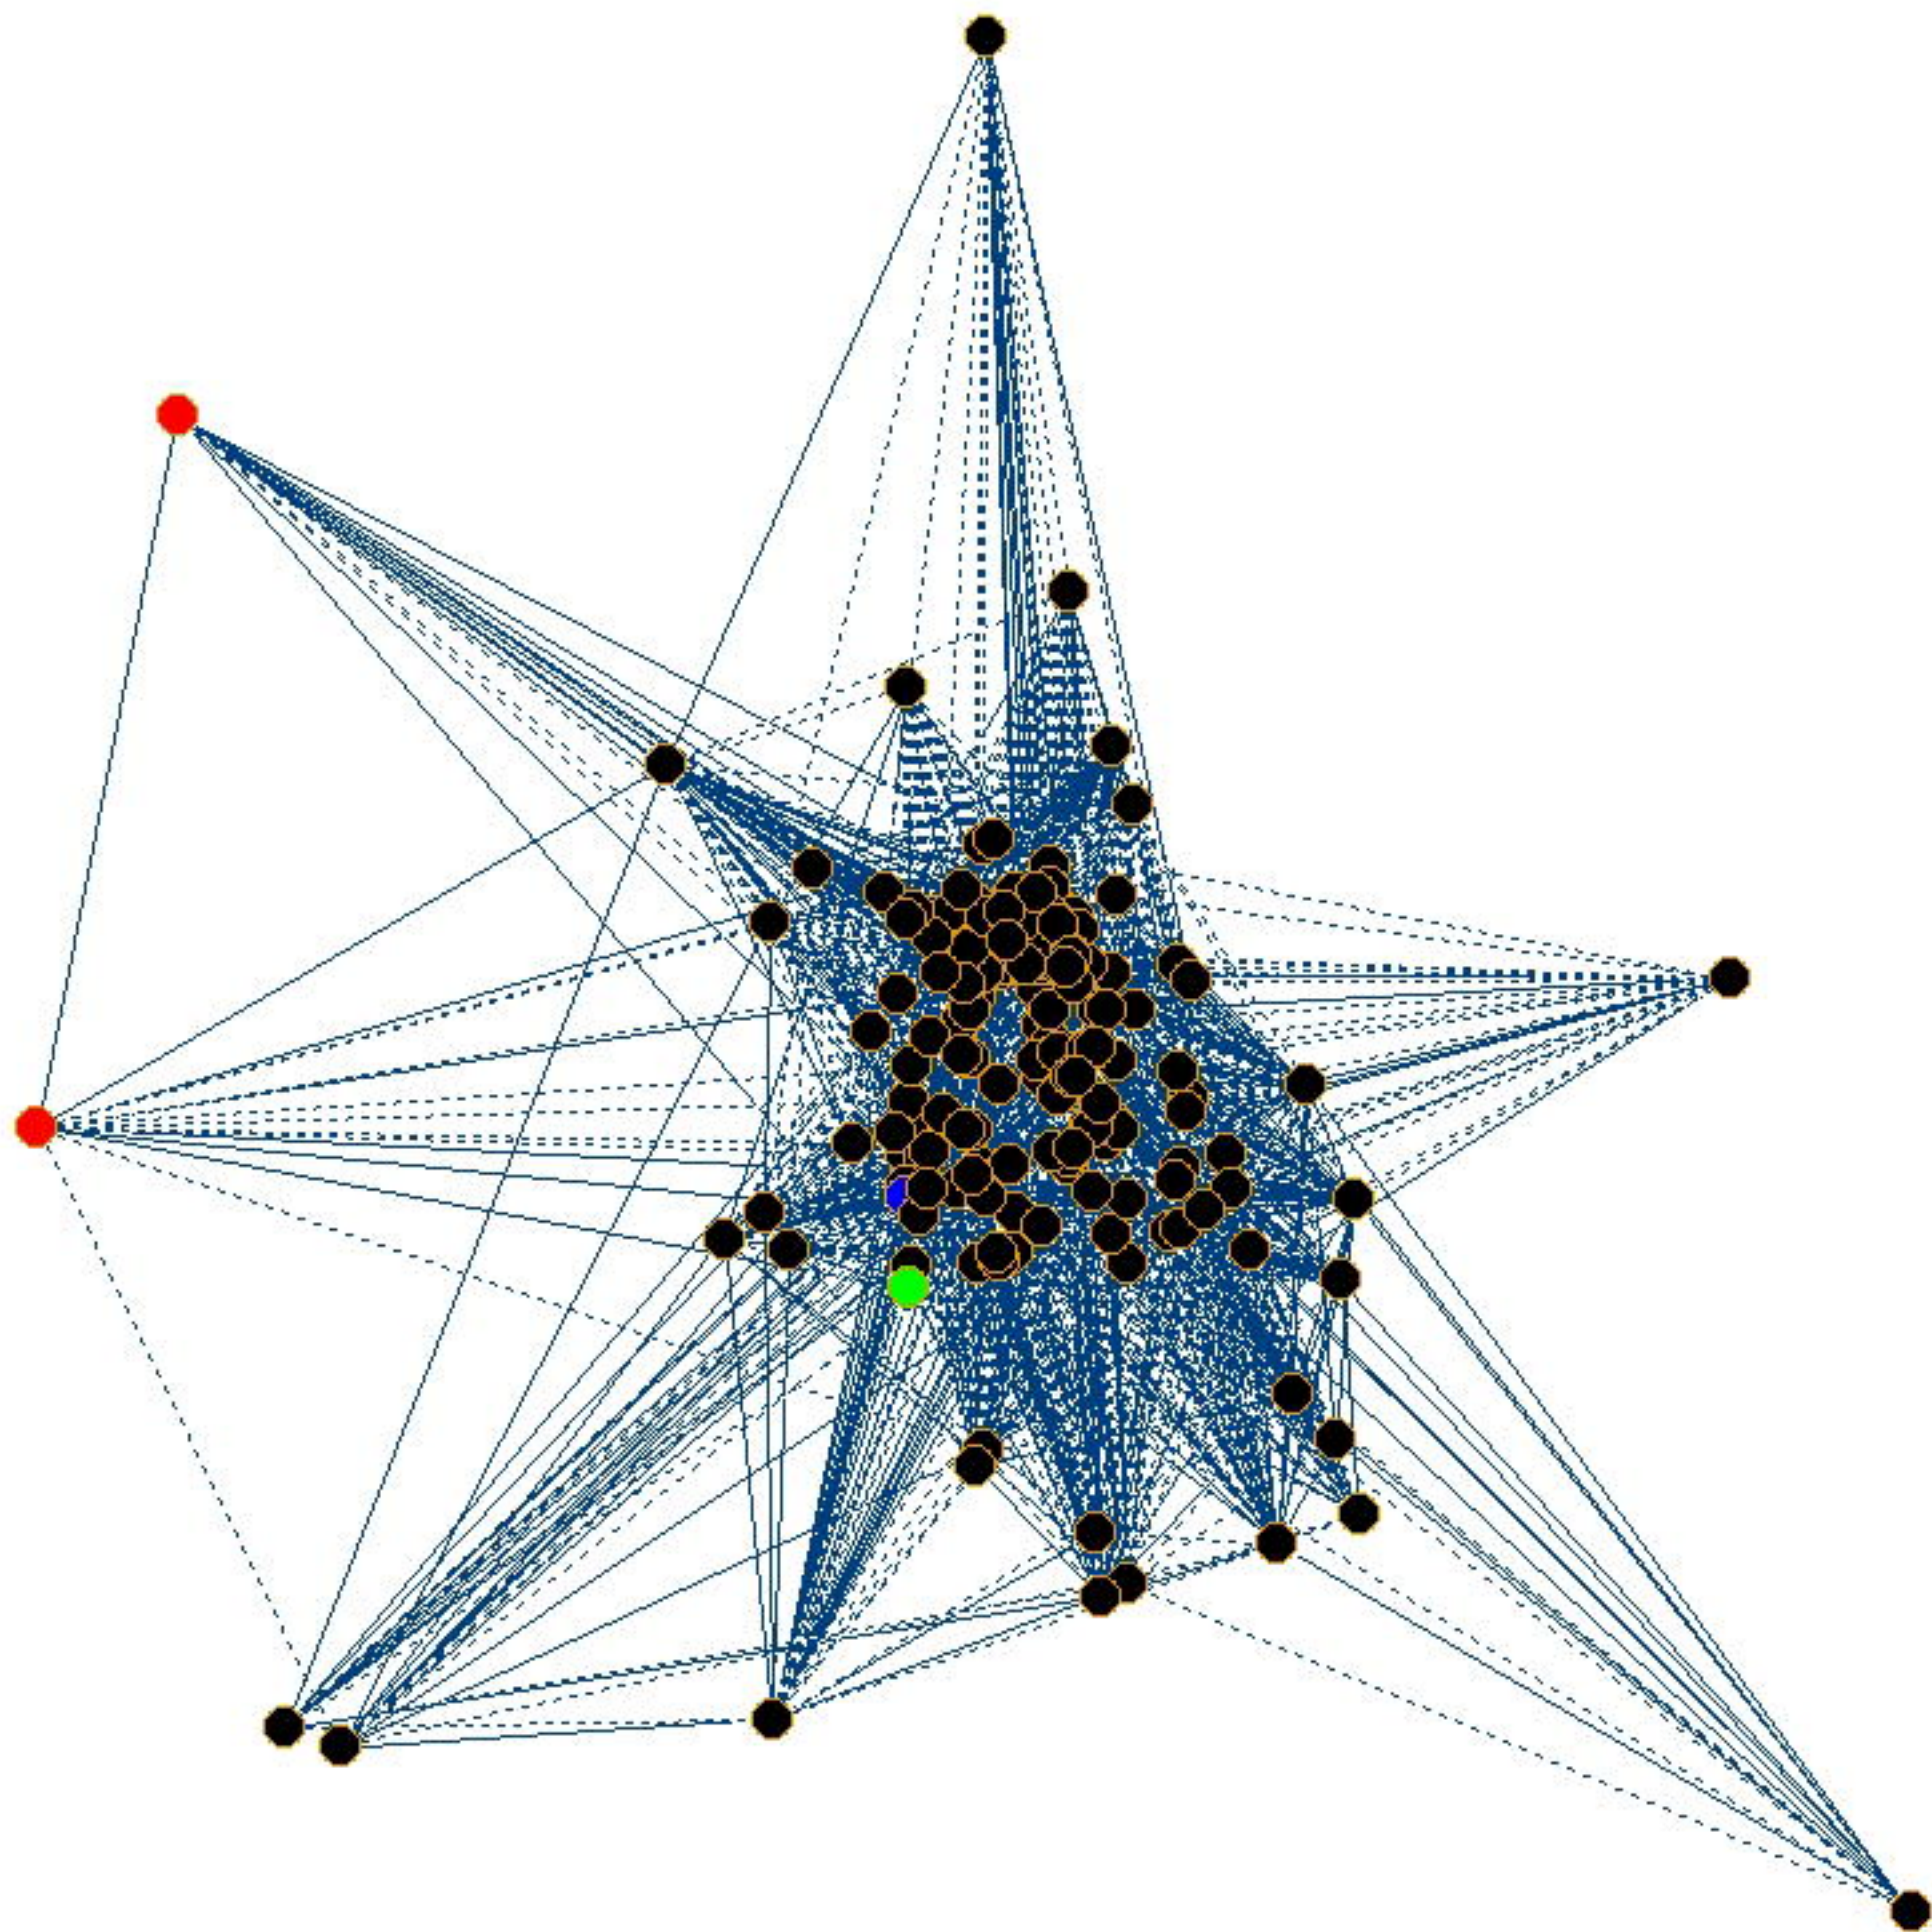

Source: https://www.biorxiv.org/content/10.1101/247981v1.full.pdf
